# Supplementary material for: Bone-strengthening activity of pinocembrin and the exploration of the mechanism by proteomics analysis
Source: Research Square preprint supplement (doi:10.21203/rs.3.rs-7656060/v1), 2025-10-09
Supplement: Supplementary file 1 [file a79a993c781e23c7e532c3aa.docx]

**Bone-strengthening activity of pinocembrin and the exploration of the mechanism by proteomics analysis**

Ayaka Tsuchiya 1, Maki Suzuki 2, Reiko Murakami 4, Kazuki Nakajima 4, Tohru Mitsunaga 1, Kosei Yamauchi 1,2,3,5 *

1 The United Graduate School of Agricultural Science, Gifu University, 1-1 Yanagido, Gifu-shi, Gifu, 501-1193, Japan

2 Graduate School of Natural Science and Technology, Gifu University, 1-1 Yanagido, Gifu-shi, Gifu, 501-1193, Japan

3 Center for One Medicine Innovative Translational Research (COMIT), Institute for Advanced Study, Gifu University, Gifu, Japan

4 Institute for Glyco-core Research (iGCORE), Gifu University, Gifu, Gifu 501-1193, Japan

5 Faculty of Applied Biological Sciences, Gifu University, 1-1 Yanagido, Gifu-shi, Gifu, 501-1193, Japan

**Corresponding author**

* Corresponding author: Kosei Yamauchi Kosei Yamauchi : yamauchi.kosei.p2@f.gifu-u.ac.jp

Contents

[Scheme 1. Synthesis scheme of pinocembrin. 3](#_Toc195176422)

[Scheme 2. Ethylamination of pinocembrin using correlation transfer catalysis. 3](#_Toc195176423)

[Table S1. 1H-NMR data of 7-*O*-ethylamino pinocembrin (Pino-EA) and 7-*O*-Boc-ethylamino pinocembrin (Pino-EA-Boc). 4](#_Toc195176424)

[Fig. S1. ¹H-NMR of 7-*O*-Boc-ethylamino pinocembrin (in ClCD₃, 600 MHz) 5](#_Toc195176425)

[Fig. S2 ¹H-NMR of 7-*O*-ethylamino pinocembrin（in MeOD, 600 MHz） 5](#_Toc195176426)

[Fig. S3. Results of preliminary breeding test. 6](#_Toc195176427)

[Fig. S4. Representative vertical cut images of femur bone. 6](#_Toc195176428)

[Table S2. Detected proteins as target protein of (±)-pinocembrin using CETSA 7](#_Toc195176429)

[Table S3. Proteins combined with pinocembrin beads by pull down assay. 8](#_Toc195176430)

[Fig. S5. Result of actin polymerization assay. 10](#_Toc195176431)

Scheme 1. Synthesis scheme of pinocembrin. (a) 2,4,6-trihydroxy acetophenone (5.95 mmol), MOM-Cl (894 µl), dichloromethane (15 ml), DIPEA (2.38 ml), 0℃ rise to room temperature. (b) benzealdehyde (6.28 mmol), EtOH/H2O (26 ml, 4:1 v/v), KOH (25 mmol), 0℃ rise to room temperature. (c) methanol (10 ml), 6N HCl-MeOH (4.4 ml), reflux. (d) MeOH (100 ml), excess sodium acetate anhydrate, reflux.

# Scheme 2. Ethylamination of pinocembrin using correlation transfer catalysis.

Table S1. 1H-NMR data of 7-*O*-ethylamino pinocembrin (Pino-EA) and 7-*O*-Boc-ethylamino pinocembrin (Pino-EA-Boc).


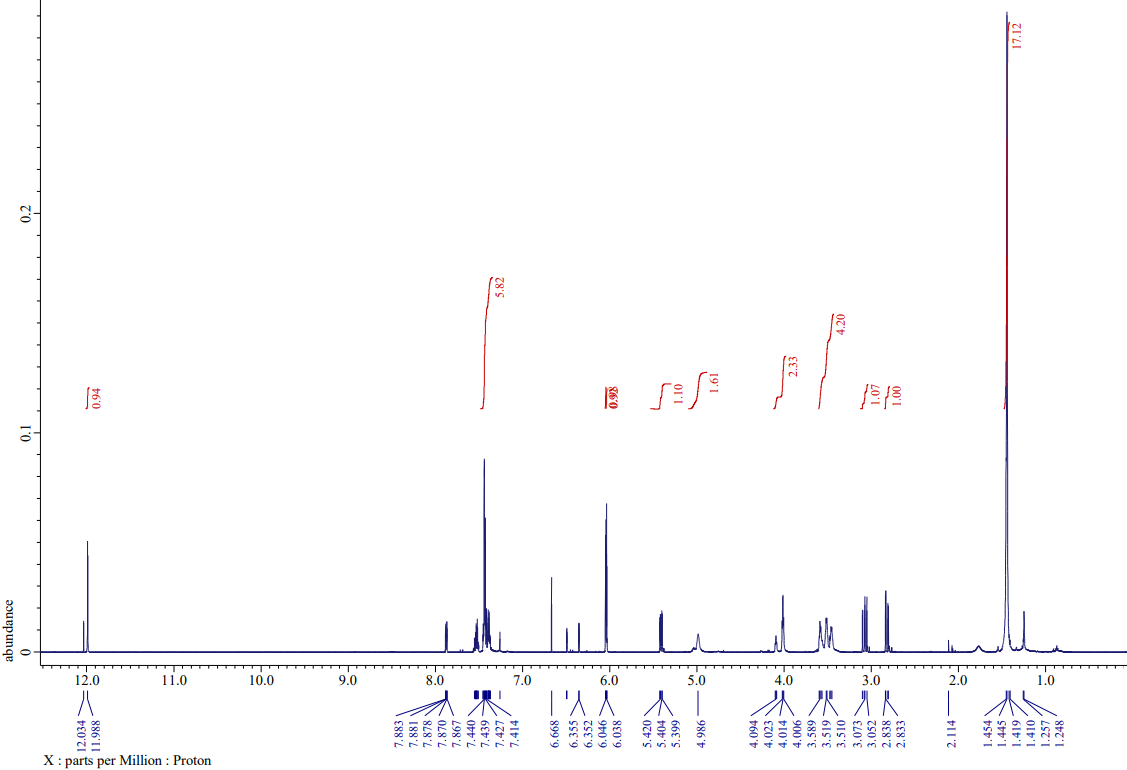


# Fig. S1. ¹H-NMR of 7-*O*-Boc-ethylamino pinocembrin (in ClCD₃, 600 MHz)


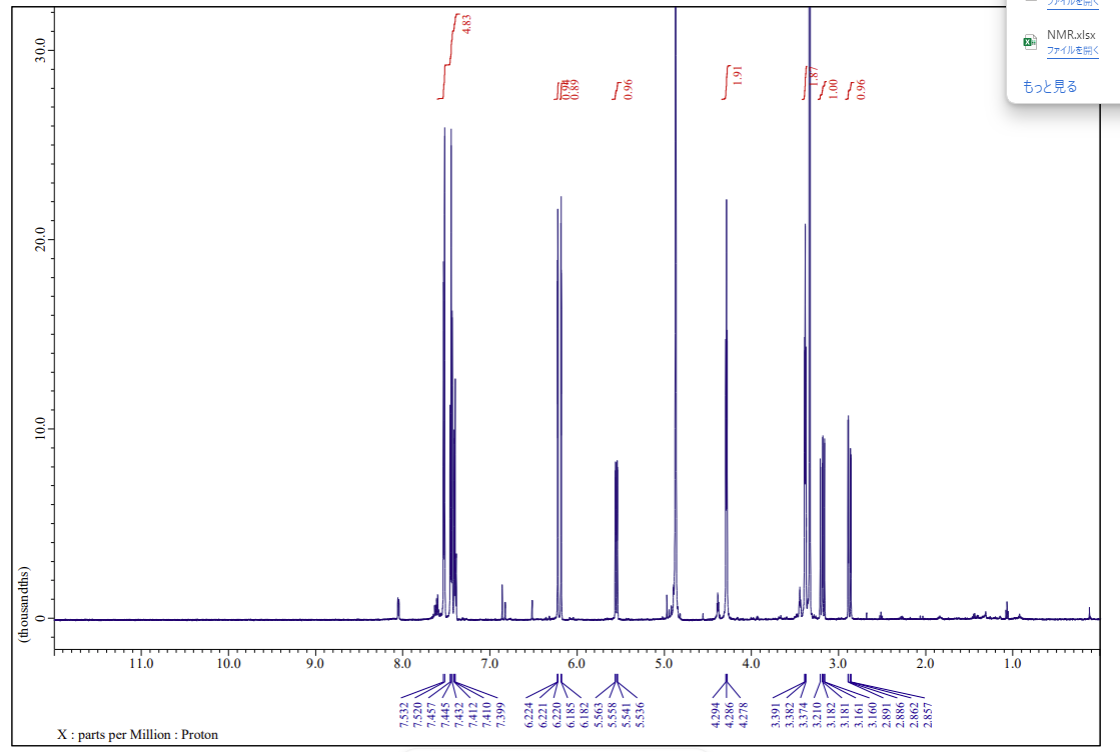


# Fig. S2 ¹H-NMR of 7-*O*-ethylamino pinocembrin（in MeOD, 600 MHz）


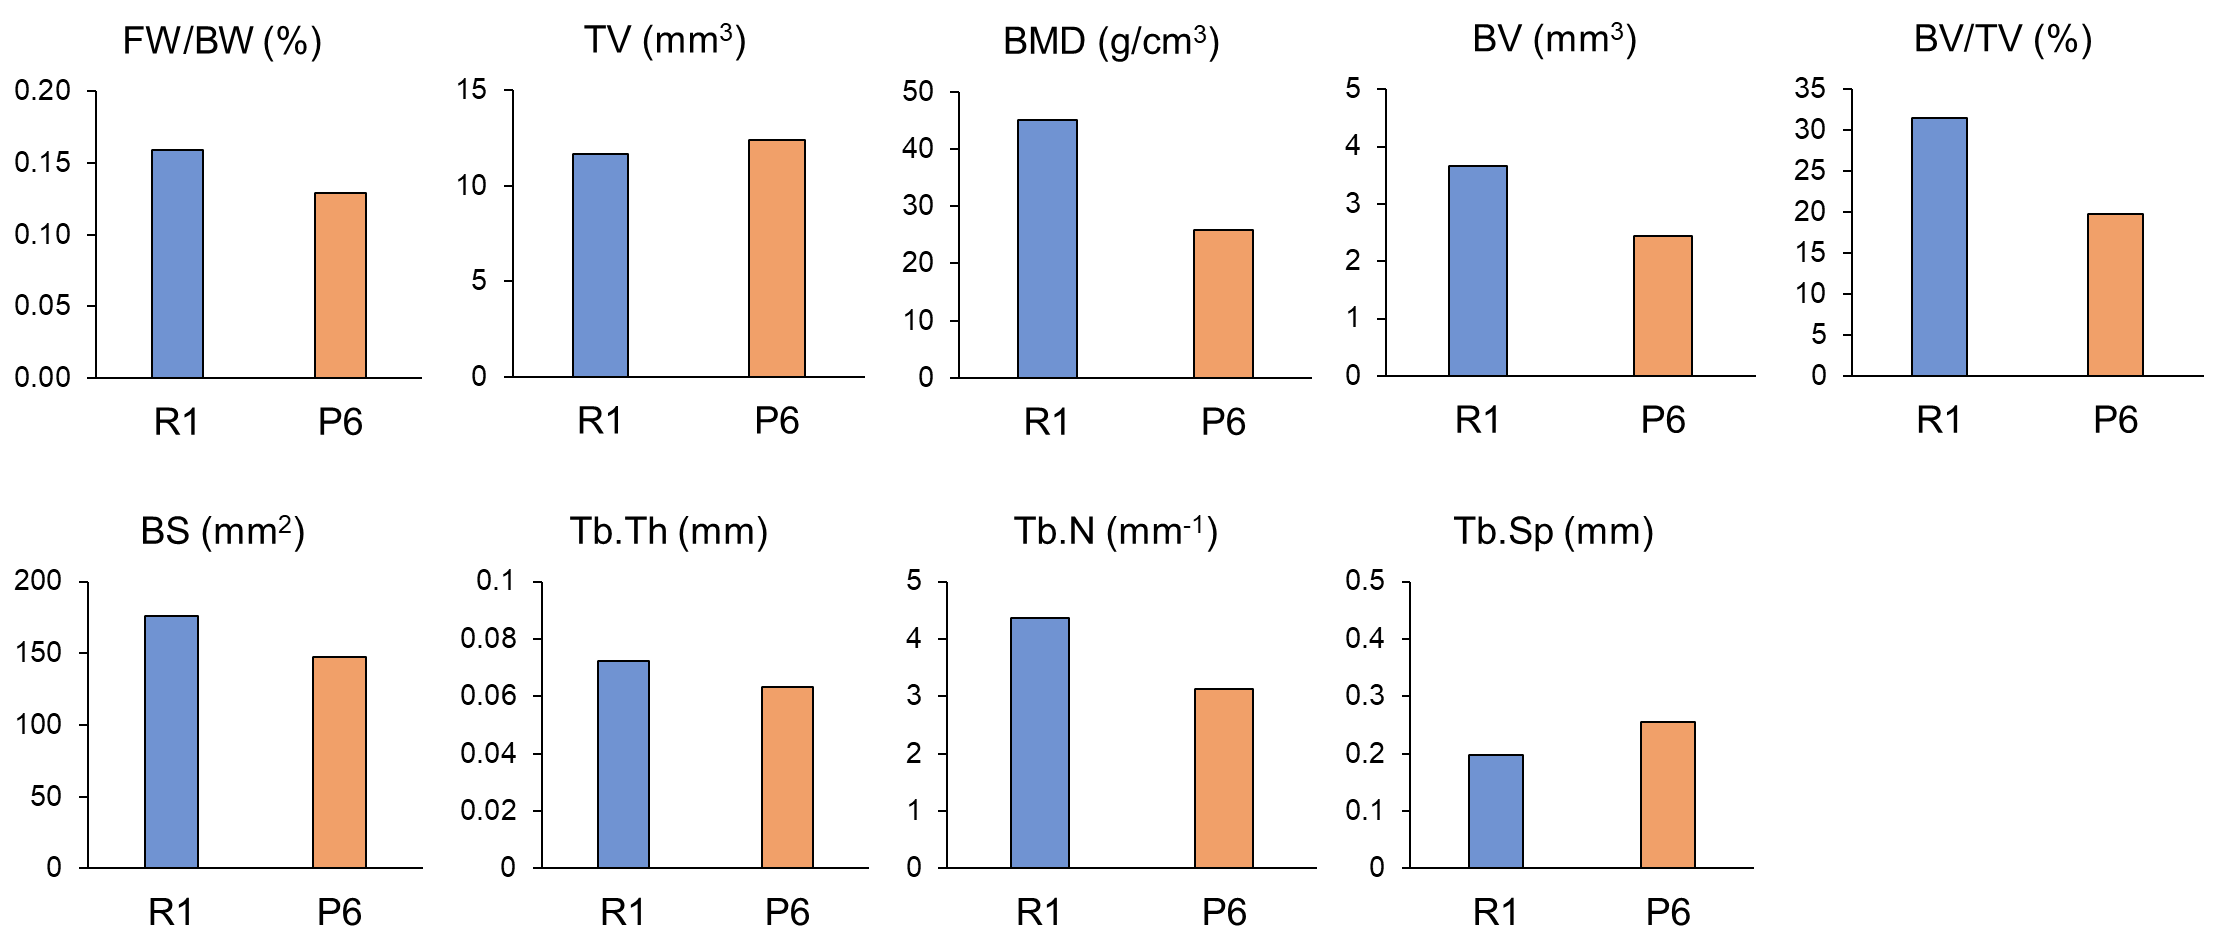


Fig. S3. Results of preliminary breeding test. Blue bar: 3-month-old SAMR1 mouse, Orange bar: 3-month-old SAMP6 mouse. FW/BW: Femur Weight/Body Weight, TV: Tissue Volume, BMD: Bone Mineral Density, BV: Bone Volume, BS: Bone Surface, Tb.Th: Trabecular Thickness, Tb.N: Trabecular Number, Tb.Sp: Trabecular Separation. BMD was calculated with 2 mm BMD phantoms as standard (0.25 and 0.75 g/cm3).


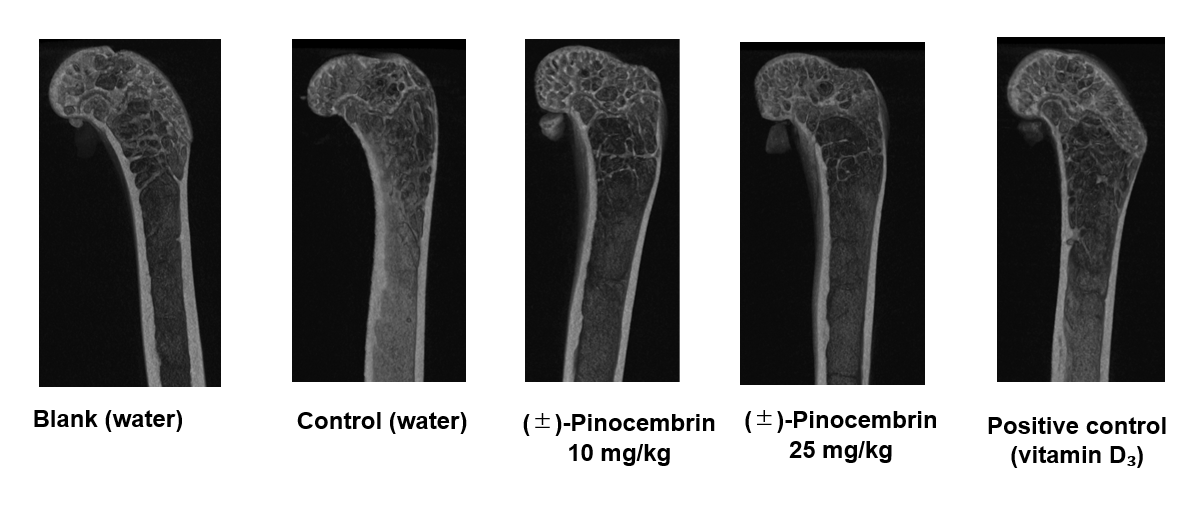


Fig. S4. Representative vertical cut images of femur bone. Mice left femur bones were dried completely and subjected to micro-CT scanning at 50 kV and 200 µA with 0.5 mm of aluminum filter. 3D reconstruction was performed using NRecon V1.7 software.

Table S2. Detected proteins as target protein of (±)-pinocembrin using CETSA

| Proteins |
| --- |
| Alpha-actinin-4 |
| Glucose-6-phosphate 1-dehydrogenase X |
| Aldehyde dehydrogenase, mitochondrial |
| Transportin-1 |
| TAR DNA-binding protein 43 |
| Activator of 90 kDa heat shock protein ATPase homolog 1 |
| Dolichyl-diphosphooligosaccharide--protein glycosyltransferase subunit |
| Superoxide dismutase [Mn], mitochondrial |
| Neutrophil cytosol factor 1 |
| Ataxin-10 |
| Integrin alpha-4 |
| Thioredoxin |
| Nicastrin |
| Single-stranded DNA-binding protein, mitochondrial |
| Microtubule-associated protein 1S |
| Tubulin alpha chain-like 3 |
| Derlin-1 |
| Patatin-like phospholipase domain-containing protein 6 |
| Mitochondrial pyruvate carrier 2 |
| Calmodulin-2 |

Table S3. Proteins combined with pinocembrin beads by pull down assay. The proteins were analyzed by LCMS proteomics.

| proteins |
| --- |
| SNW domain-containing protein 1 |
| Nuclear fragile X mental retardation-interacting protein 2 |
| RNA-binding protein 10 |
| Retroviral-like aspartic protease 1 |
| Centromere protein V, W |
| Coiled-coil domain-containing protein 47 |
| nuclear pore complex protein Nup98-Nup96 |
| Pre-mRNA-splicing factor ATP-dependent RNA helicase PRP16 |
| Immunoglobulin lambda-like polypeptide 5 |
| Regulator of chromosome condensation |
| nuclear pore complex protein nup155 |
| Pleiotropic regulator 1 |
| RNA-binding motif protein, X-linked 2 |
| General transcription factor IIF subunit 2 |
| Gamma-glutamyl hydrolase |
| RING1 and YY1-binding protein |
| BUD13 homolog |
| pre-mRNA 3' end processing protein WDR33 |
| Nebulin-related-anchoring protein |
| RB1-inducible coiled-coil protein 1 |
| Protein NipSnap homolog 2 |
| G2/mitotic-specific cyclin-B2 |
| DNA-directed RNA polymerase II subunit RPB2 |
| metal transporter CNNM4 |
| Keratin, type II cytoskeletal 2 oral |
| Small acidic protein |
| transcription factor BTF3 homolog 4 |
| 40S ribosomal protein S27-like |
| gamma-glutamylcyclotransferase |
| Elongin-A |
| puromycin-sensitive aminopeptidase |
| Salivary acidic proline-rich phosphoprotein 1/2 |
| Cold-inducible RNA-binding protein |
| Succinyl-CoA:3-ketoacid coenzyme A transferase 2, mitochondrial |
| Histone-arginine methyltransferase CARM1 |
| DNA-directed RNA polymerase II subunit RPB1 |
| Zinc finger CCCH domain-containing protein 4 |
| Mucin-like protein 1 |
| Probable ribosome biogenesis protein RLP24 |
| Ribosomal RNA small subunit methyltransferase Nep1 |
| lipoprotein lipase |
| Leucine-rich repeat-containing protein 40 |
| Cathepsin L2 |
| Long-chain-fatty-acid--CoA ligase 5 |
| Protein NipSnap homolog 1 |
| 39S ribosomal protein L34, mitochondrial |
| alpha-N-acetylgalactosaminide alpha-2,6-sialyltransferase 5 |
| Pyridoxal kinase |
| Kinesin-like protein KIF2A |
| Receptor-type tyrosine-protein phosphatase beta |
| tRNA-dihydrouridine(20) synthase [NAD(P)+]-like |
| Shugoshin 2 |
| Cathepsin B [OS=Homo sapiens] |

Fig. S5. Result of actin polymerization assay. Fluorescence was measured for 1h at Ex/Em= 365/410 nm. Orange line: control, Gray line: 25 µM of (±)-pinocembrin, Yellow line: 100 µM of (±)-pinocembrin.
